# Supplementary material for: Efficient Approach for Direct Robust Surface Grafting of Polyethyleneimine onto a Polyester Surface during Moulding
Source: MDPI journal article supplement (doi:10.3390/polym16050644), 2024-02-27
Supplement: s1 [file s1]

# Efficient approach for direct robust surface grafting of polyethylenimine onto a polyester surface during moulding

Philipp Zimmermann<sup>1</sup>, Silven Frohs<sup>1</sup>, Martin Wiesing<sup>2</sup>, Kamal Meena<sup>1</sup>, Jürgen Nagel<sup>1</sup>

## Supporting Information

### S1) General conditions

#### a) Evaluation of extinction coefficient of pyranine over broad concentration range

A stock solution of pyranine with a concentration of  $10^{-4}$  M in water was prepared and its pH value adjusted to 9 by adding 1 M NaOH solution and borate buffer. Solutions of this stock solution were prepared by dilution with borate puffer at pH value of 9. Optical spectra were recorded with a Cary 60 spectrometer (Agilent, USA) from 300 to 600 nm. The maxima absorption was at 455 nm for all solutions. The maxima were displayed as a function of concentration in Figure S1-1. An extinction coefficient of  $20\,950\text{ l mol}^{-1}\text{ cm}^{-1}$  was calculated by linear regression over the concentration range from  $10^{-6}$  to  $10^{-4}$  M. This equals the value mentioned in literature [52].

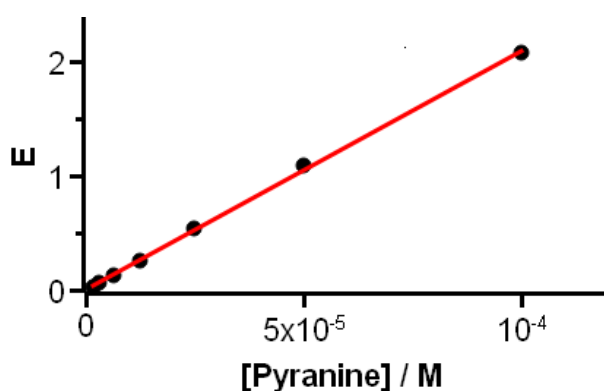

**Figure S1-1.** Extinction as a function of pyranine concentration.  $\epsilon(\lambda = 455\text{nm}) = 20950\text{ l mol}^{-1}\text{ cm}^{-1}$

## b) Error evaluation

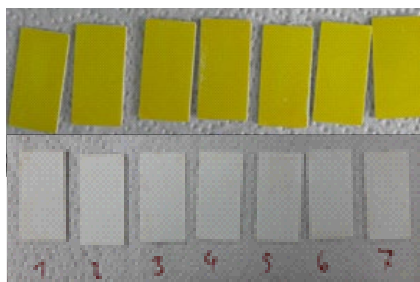

**Figure S1-2.** Seven printed samples, extracted in water and stained with pyranine (top) and after extraction in 1 M NaOH solution (bottom).

Seven samples were prepared and treated according to the experimental procedure under identical conditions. The average and the relative standard deviation were calculated.

*Table S1-1. Evaluation of the statistical error of the measurement procedure.*

| Sample no.                   | E (455 nm) | $v^a$ /ml | $n^b(\text{Py})$ /nmol | $n/A^c(\text{Py}) / \text{mol m}^{-2}$ |
|------------------------------|------------|-----------|------------------------|----------------------------------------|
| 1                            | 0.285      | 50        | 680                    | $0.85 \cdot 10^{-3}$                   |
| 2                            | 0.25       | 50        | 595                    | $0.744 \cdot 10^{-3}$                  |
| 3                            | 0.245      | 50        | 570                    | $0.713 \cdot 10^{-3}$                  |
| 4                            | 0.245      | 50        | 585                    | $0.731 \cdot 10^{-3}$                  |
| 5                            | 0.315      | 50        | 740                    | $0.925 \cdot 10^{-3}$                  |
| 6                            | 0.235      | 50        | 560                    | $0.70 \cdot 10^{-3}$                   |
| 7                            | 0.135      | 100       | 644                    | $0.805 \cdot 10^{-3}$                  |
| <b>Average</b>               |            |           |                        | $0.78 \cdot 10^{-3}$                   |
| <b>deviation</b>             |            |           |                        | $0.77 \cdot 10^{-3}$                   |
| <b>relative deviation /%</b> |            |           |                        | 10                                     |

a) Volume of the extract solution after dilution and adjustment of pH value to 9.

b) Amount of pyranine in extract solution according to Lambert's law.

c) Amount of pyranine of (b) divided by sample area.

**Conclusion:** The error of the measurement procedure was about 10 %. Extractions were made with 1 M NaOH.  $M_w(\text{PEI})=750 \text{ kg mol}^{-1}$ .

## S2) Variation of alkali concentration

The samples prepared using PEI with different molar masses were stained with pyranine and extracted in different concentrations of NaOH. The raw data presented here correspond to the appropriate experiments in the main part of the manuscript.

**Table S2-1.** Measurement data.  $M_w(\text{PEI})=750 \text{ kg mol}^{-1}$ .

| Sample no. | [NaOH]/M         | E(455 nm) | v/ml | n/A / mol·m <sup>-2</sup> |
|------------|------------------|-----------|------|---------------------------|
| 1          | 10 <sup>-6</sup> | 0.0004    | 50   | 0.0119 · 10 <sup>-4</sup> |
| 2          | 10 <sup>-5</sup> | 0.002     | 50   | 0.0596 · 10 <sup>-4</sup> |
| 3          | 10 <sup>-4</sup> | 0.001     | 50   | 0.0298 · 10 <sup>-4</sup> |
| 4          | 10 <sup>-3</sup> | 0.16      | 50   | 4.7681 · 10 <sup>-4</sup> |
| 5          | 10 <sup>-2</sup> | 0.20      | 50   | 5.96 · 10 <sup>-4</sup>   |
| 6          | 10 <sup>-1</sup> | 0.207     | 50   | 6.17 · 10 <sup>-4</sup>   |
| 7          | 1                | 0.1       | 100  | 5.96 · 10 <sup>-4</sup>   |

## S3) Repeated extraction at different NaOH concentrations

The samples prepared using PEI-750k were repeatedly stained with pyranine and extracted in different concentrations of NaOH. Raw data presented here are from optical measurements.

**Table S3-1.** Pyranine amounts for PEI-750k extracted with [NaOH]=0.01 M

| Cycle no. | E(455 nm) | v/ml | n/A / mole·m <sup>-2</sup> |
|-----------|-----------|------|----------------------------|
| 1         | 0.26      | 50   | 7.75 · 10 <sup>-4</sup>    |
| 2         | 0.245     | 50   | 7.3 · 10 <sup>-4</sup>     |
| 3         | 0.23      | 50   | 6.85 · 10 <sup>-4</sup>    |
| 4         | 0.22      | 50   | 6.56 · 10 <sup>-4</sup>    |
| 5         | 0.23      | 50   | 6.85 · 10 <sup>-4</sup>    |
| 6         | 0.21      | 50   | 6.85 · 10 <sup>-4</sup>    |
| 7         | 0.185     | 50   | 5.51 · 10 <sup>-4</sup>    |
| 8         | 0.13      | 50   | 3.88 · 10 <sup>-4</sup>    |
| 9         | 0.13      | 50   | 3.88 · 10 <sup>-4</sup>    |
| 10        | 0.125     | 50   | 3.73 · 10 <sup>-4</sup>    |

**Table S3-2.** *Pyranine amounts for PEI-750k extracted with [NaOH]=0.1 M*

| Cycle no. | E(455 nm) | v/ml | n/A / mole·m <sup>-2</sup> |
|-----------|-----------|------|----------------------------|
| 1         | 0.225     | 50   | $6.7 \cdot 10^{-4}$        |
| 2         | 0.245     | 50   | $7.3 \cdot 10^{-4}$        |
| 3         | 0.235     | 50   | $7.0 \cdot 10^{-4}$        |
| 4         | 0.1025    | 100  | $6.13 \cdot 10^{-4}$       |
| 5         | 0.2       | 50   | $5.96 \cdot 10^{-4}$       |
| 6         | 0.112     | 50   | $3.34 \cdot 10^{-4}$       |
| 7         | 0.082     | 50   | $2.44 \cdot 10^{-4}$       |
| 8         | 0.046     | 50   | $1.37 \cdot 10^{-4}$       |
| 9         | 0.046     | 50   | $1.37 \cdot 10^{-4}$       |
| 10        | 0.015     | 50   | $0.45 \cdot 10^{-4}$       |

**Table S3-3.** *Pyranine amounts for PEI-750k extracted with [NaOH]=1 M*

| Cycle no. | E(455 nm) | v/ml | n/A / mole·m <sup>-2</sup> |
|-----------|-----------|------|----------------------------|
| 1         | 0.115     | 100  | $6.85 \cdot 10^{-4}$       |
| 2         | 0.08      | 100  | $4.76 \cdot 10^{-4}$       |
| 3         | 0.004     | 100  | $0.24 \cdot 10^{-4}$       |
| 4         | 0.003     | 100  | $0.18 \cdot 10^{-4}$       |
| 5         | 0.004     | 100  | $0.24 \cdot 10^{-4}$       |
| 6         | 0.002     | 100  | $0.12 \cdot 10^{-4}$       |
| 7         | 0.003     | 100  | $0.18 \cdot 10^{-4}$       |
| 8         | 0.003     | 100  | $0.18 \cdot 10^{-4}$       |
| 9         | 0.001     | 100  | $0.06 \cdot 10^{-4}$       |
| 10        | 0.002     | 100  | $0.12 \cdot 10^{-4}$       |

## S4) Variation of molar mass of PEI

The samples prepared using PEI of different molar mass were repeatedly stained with pyranine and extracted in 0.01 M NaOH. Raw data presented here are from optical measurements.

**Table S4-1.** Pyranine amounts for  $M_w(\text{PEI})=25 \text{ kg mol}^{-1}$

| Cycle no. | E*    | v/ml | n/A /mol/m <sup>-2</sup> | $\sigma_{\text{relative}}/\%$ |
|-----------|-------|------|--------------------------|-------------------------------|
| 1         | 0.128 | 50   | $3.82 \cdot 10^{-4}$     | 5.5                           |
| 2         | 0.093 | 50   | $2.76 \cdot 10^{-4}$     | 8.2                           |
| 3         | 0.083 | 50   | $2.48 \cdot 10^{-4}$     | 8.7                           |
| 4         | 0.077 | 50   | $2.3 \cdot 10^{-4}$      | 7                             |
| 5         | 0.078 | 50   | $2.33 \cdot 10^{-4}$     | 7.4                           |

\* Averaged from 4 values

**Table S4-2.** Pyranine amounts for  $M_w(\text{PEI})=2 \text{ kg mol}^{-1}$

| Cycle no. | E*    | v/ml | n/A /mol/m <sup>-2</sup> | $\sigma_{\text{relative}}/\%$ |
|-----------|-------|------|--------------------------|-------------------------------|
| 1         | 0.074 | 50   | $2.21 \cdot 10^{-4}$     | 6.3                           |
| 2         | 0.078 | 50   | $2.33 \cdot 10^{-4}$     | 14.2                          |
| 3         | 0.076 | 50   | $2.27 \cdot 10^{-4}$     | 5.1                           |
| 4         | 0.046 | 50   | $1.37 \cdot 10^{-4}$     | 5.2                           |
| 5         | 0.049 | 50   | $1.46 \cdot 10^{-4}$     | 5.6                           |

\* Averaged from 4 values

## References

- 52 J.S. Lindsey, M. Taniguchi, H. Du, PhotochemCAD 1998-2023, <https://photochemcad.com/databases/common-compounds/polycyclic-aromatic-hydrocarbons/pyranine>, accessed 16 October 2023
